# Supplementary material for: Nanosynthesis of Silver-Calcium Glycerophosphate: Promising Association against Oral Pathogens
Source: PubMed Central journal article supplement (PMC6163287; doi:10.3390/antibiotics7030052), 2018-06-27
Supplement: antibiotics-07-00052-s001.pdf [file antibiotics-07-00052-s001.pdf]

## Nanosynthesis of silver-calcium glycerophosphate: promising association against oral pathogens

Gabriela Lopes Fernandes<sup>1</sup>, Alberto Carlos Botazzo Delbem<sup>2</sup>, Jackeline Gallo do Amaral<sup>2</sup>, Luiz Fernando Gorup<sup>3,4</sup>, Renan Aparecido Fernandes<sup>1,5</sup>, Francisco Nunes de Souza Neto<sup>3</sup>, José Antonio Santos Souza<sup>2</sup>, Douglas Roberto Monteiro<sup>6</sup>, Alessandra Marçal Agostinho Hunt<sup>7</sup>, Emerson Rodrigues Camargo<sup>3</sup>, Debora Barros Barbosa<sup>1\*</sup>

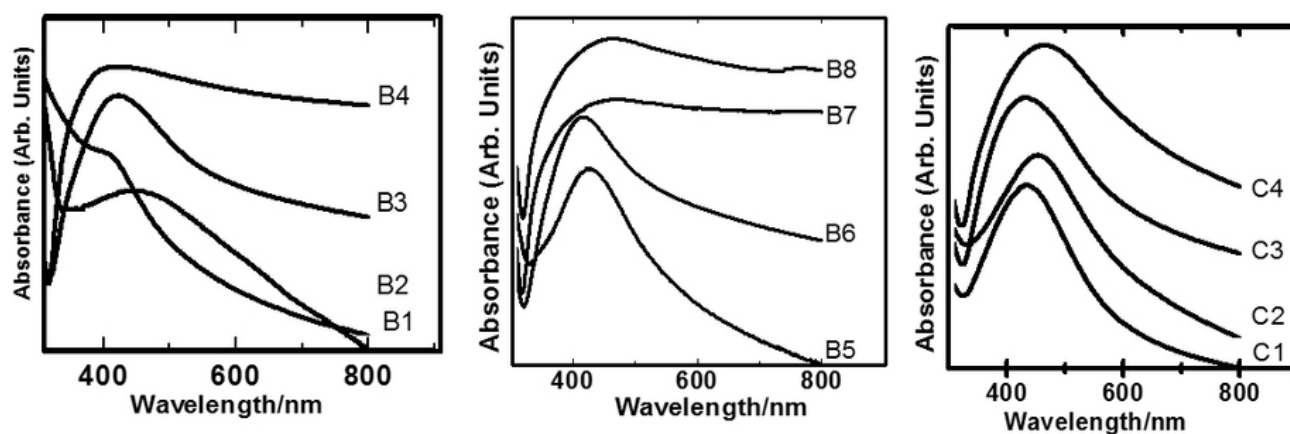

Figure S1: UV-Visible spectrum of Ag-CaGP nanocomposites.

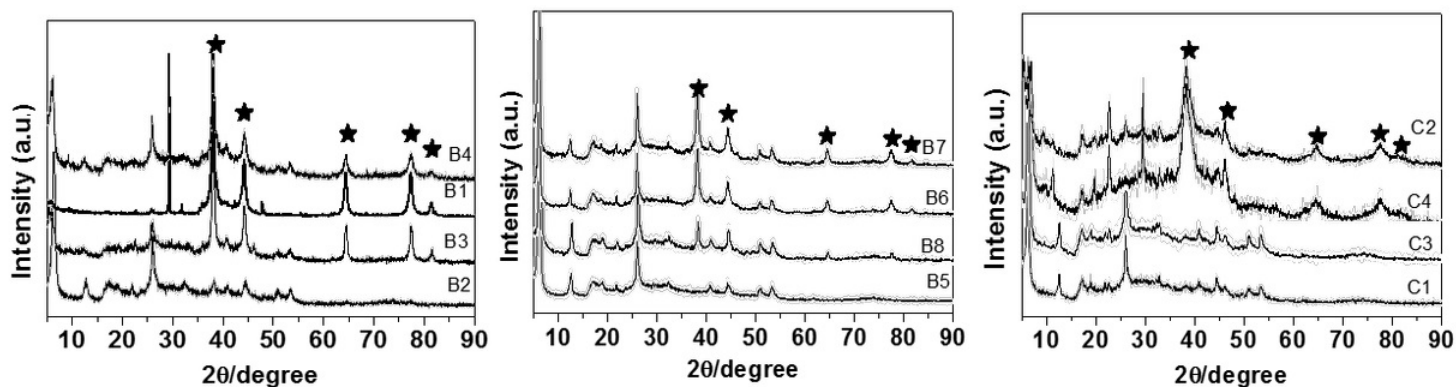

Figure S2: XRD pattern of Ag-CaGP nanocomposites.

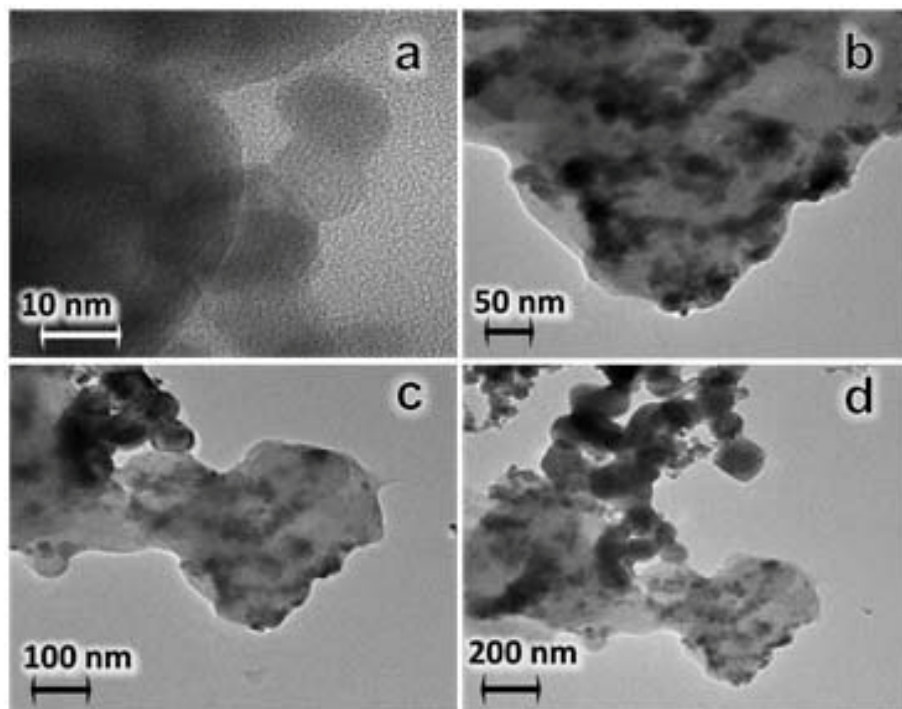

**Figure S3:** TEM images of B4 Ag-CaGP nanocomposite.

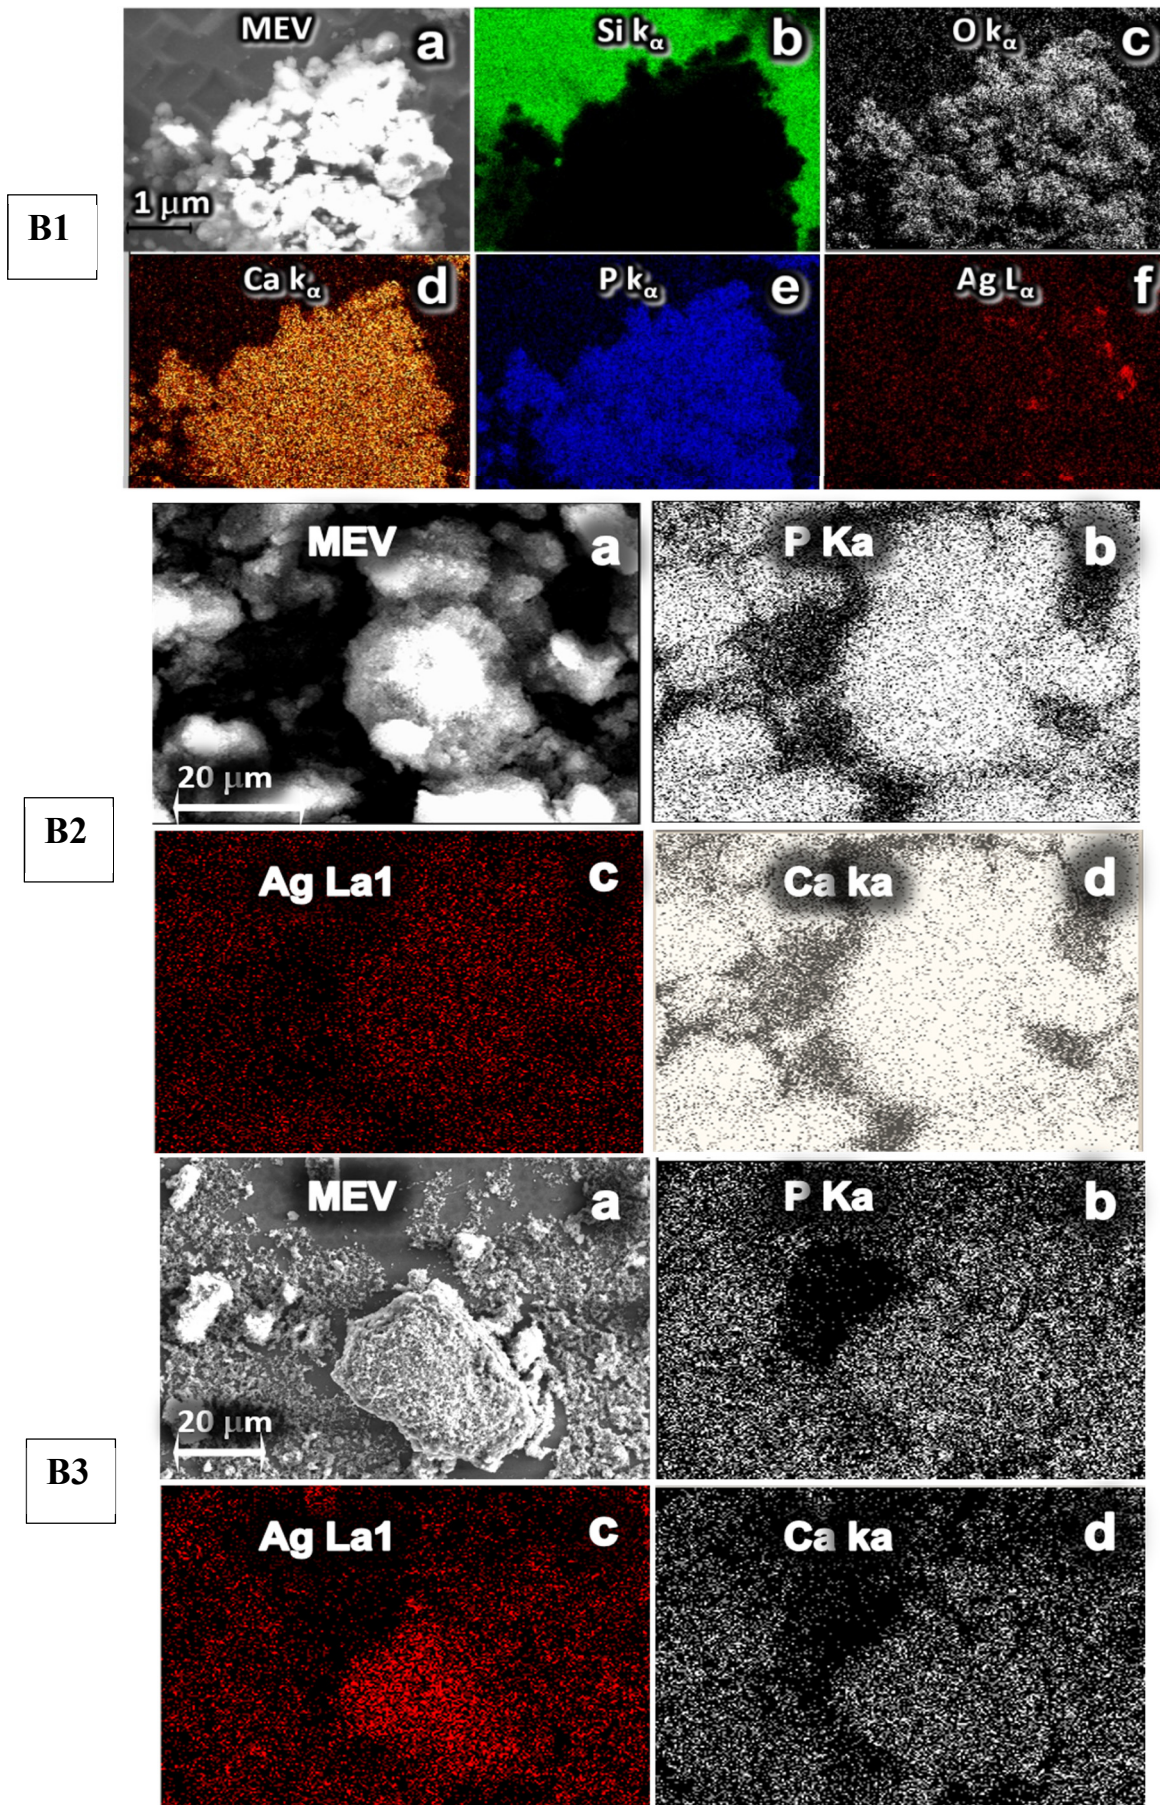

**Figure S4:** SEM images and energy-dispersive X-ray spectroscopy (EDS) mapping in 2D elements issuance Si K<sub>α</sub>, O K<sub>α</sub>, P K<sub>α</sub>, Ca K<sub>α</sub> and Ag K<sub>α</sub> false color. Analysis of the distribution of silver nanoparticles in the Ag-CaGP nanocomposites B1, B2 and B3

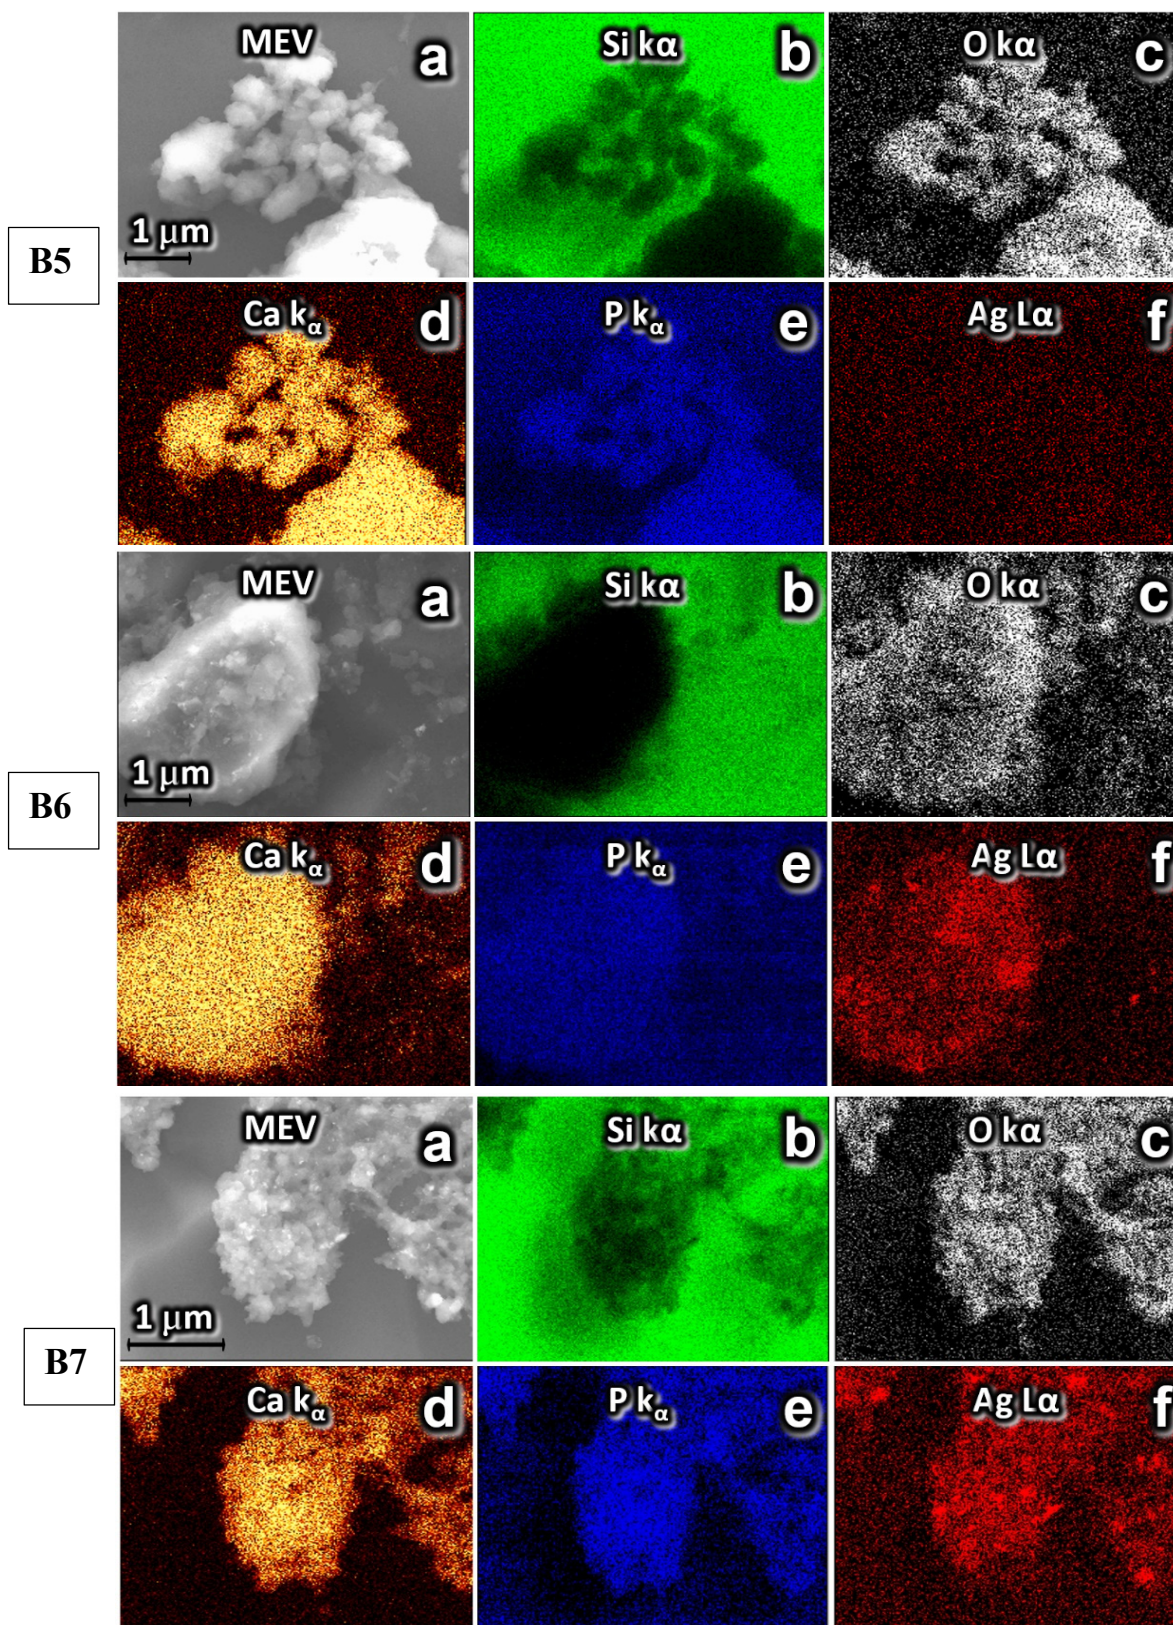

**Figure S5:** SEM images and EDS mapping in 2D elements issuance Si  $K_{\alpha}$ , O  $K_{\alpha}$ , P  $K_{\alpha}$ , Ca  $K_{\alpha}$  and Ag  $K_{\alpha}$  false color. Analysis of the distribution of silver in the Ag-CaGP nanocomposites B5, B6 and B7

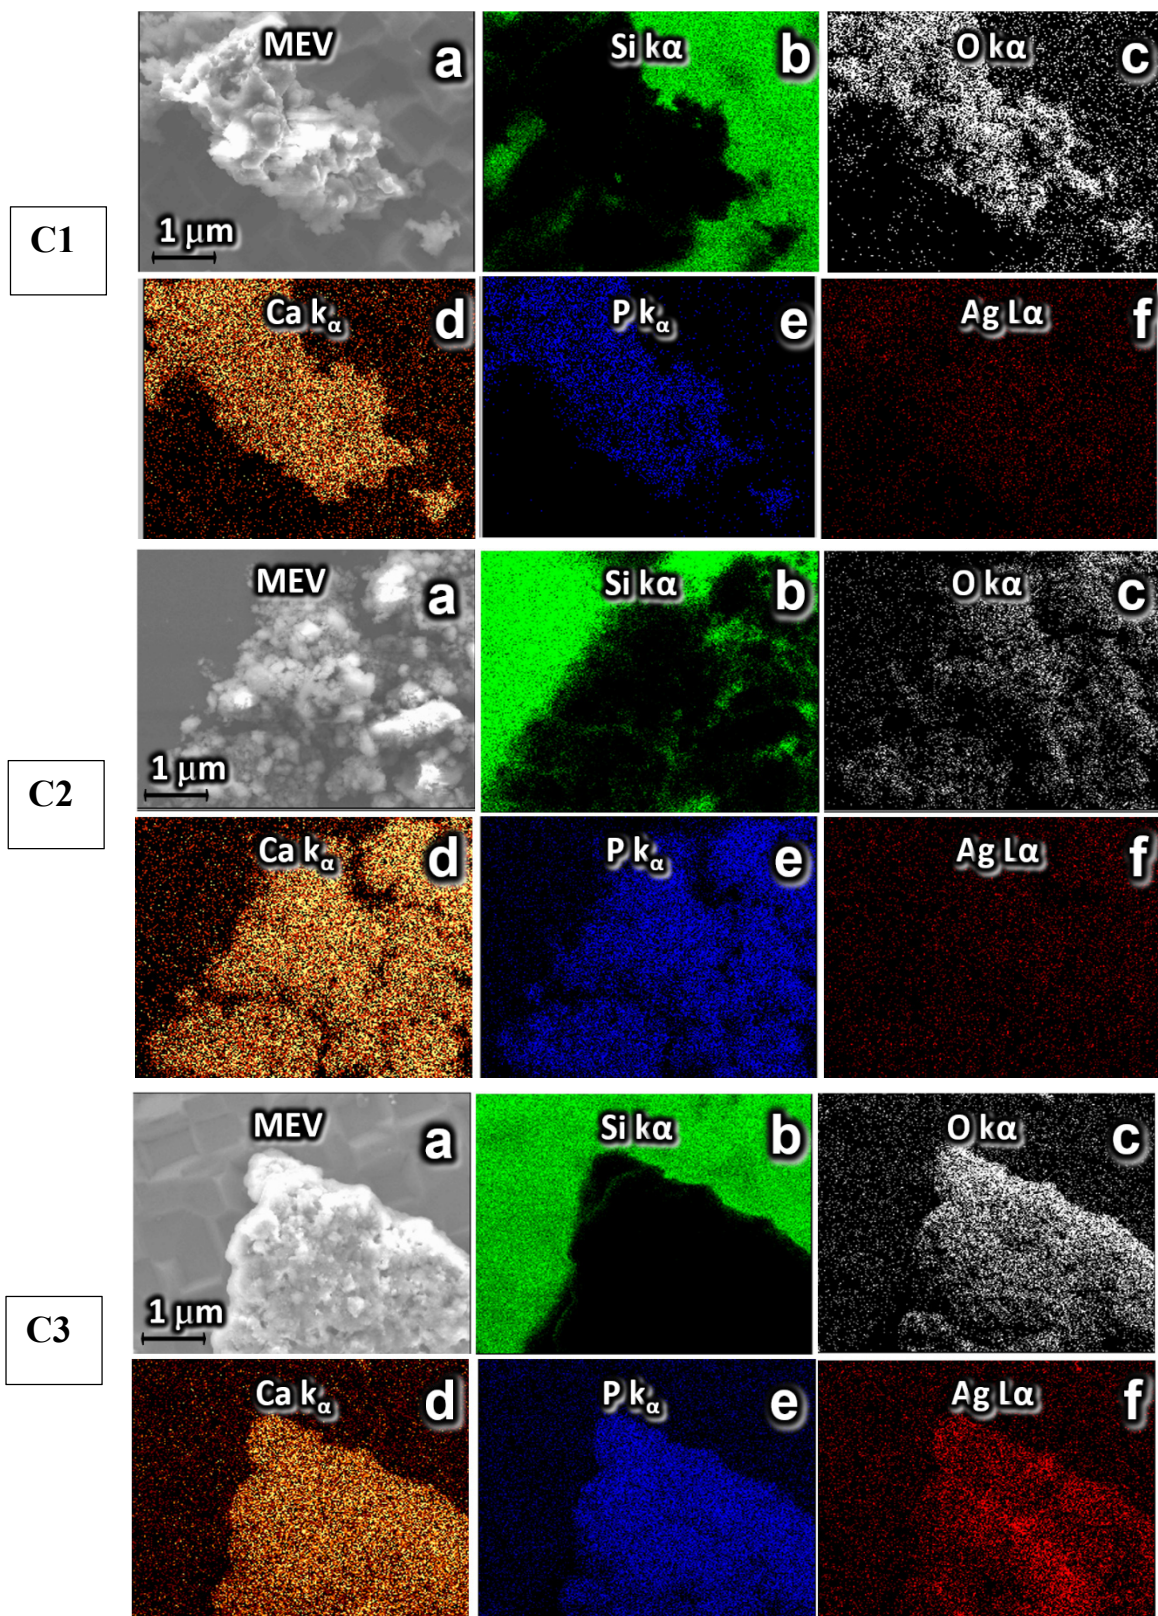

**Figure S6:** SEM images and EDS mapping in 2D elements issuance Si K $\alpha$ , O K $\alpha$ , P K $\alpha$ , Ca K $\alpha$  and Ag K $\alpha$  false color. Analysis of the distribution of silver nanoparticles in the Ag-CaGP nanocomposites C1, C2 and C3.
